## ANESTHESIOLOGY

# Spinal Anesthesia with Targeted Sedation based on Bispectral Index Values Compared with General Anesthesia with Masked Bispectral Index Values to Reduce Delirium: The SHARP Randomized Controlled Trial

Charles H. Brown IV, M.D., M.H.S., Charles Edwards II, M.D., Charles Lin, M.D., Emily Ledford Jones, M.S., R.N., C.N.L., Lisa R. Yanek, M.P.H., Melody Esmaili, C.R.N.A., Yara Gorashi, B.A., Richard Skelton, B.S., M.H.S., Daniel Kaganov, B.A., Ryan Curto, B.A., Noah L. Lessing, B.S., Stephanie Cha, M.D., Elizabeth Colantuoni, Ph.D., Karin Neufeld, M.D., M.P.H., Frederick Sieber, M.D., Clayton L. Dean, M.D., Charles W. Hogue, M.D.

ANESTHESIOLOGY 2021; 135:992–1003

## EDITOR'S PERSPECTIVE

### What We Already Know about This Topic

- There are controversies about the value of processed electroencephalogram (*e.g.*, Bispectral Index [BIS]) guided anesthetic management for the prevention of postoperative delirium
- It is unclear whether reducing depth of anesthesia by the use of sedation with regional anesthesia decreases the risk of postoperative delirium compared to the use of general anesthesia

### What This Article Tells Us That Is New

- This prospective single-center trial randomized patients undergoing spine surgery to spinal anesthesia with targeted sedation to BIS greater than 60 to 70 *versus* general anesthesia without BIS guidance
- There was no difference in the incidence of postoperative delirium between randomized groups in the trial
- Future studies are needed to determine whether these findings can be replicated at other centers and whether the results differ by cognitive status

## ABSTRACT

**Background:** Reducing depth of anesthesia and anesthetic exposure may help prevent delirium, but trials have been conflicting. Most studies were conducted under general anesthesia or in cognitively impaired patients. It is unclear whether reducing depth of anesthesia beyond levels consistent with general anesthesia reduces delirium in cognitively intact patients. The authors' objective was to determine whether a bundled approach to reduce anesthetic agent exposure as determined by Bispectral Index (BIS) values (spinal anesthesia with targeted sedation based on BIS values) compared with general anesthesia (masked BIS) reduces delirium.

**Methods:** Important eligibility criteria for this parallel-arm randomized trial were patients 65 yr or greater undergoing lumbar spine fusion. The intervention group received spinal anesthesia with targeted sedation to BIS greater than 60 to 70. The control group received general anesthesia (masked BIS). The primary outcome was delirium using the Confusion Assessment Method daily through postoperative day 3, with blinded assessment.

**Results:** The median age of 217 patients in the analysis was 72 (interquartile range, 69 to 77). The median BIS value in the spinal anesthesia with targeted sedation based on BIS values group was 62 (interquartile range, 53 to 70) and in the general anesthesia with masked BIS values group was 45 (interquartile range, 41 to 50;  $P < 0.001$ ). Incident delirium was not different in the spinal anesthesia with targeted sedation based on BIS values group (25.2% [28 of 111] *vs.* the general anesthesia with masked BIS values group (18.9% [20 of 106];  $P = 0.259$ ; relative risk, 1.22 [95% CI, 0.85 to 1.76]). In prespecified subgroup analyses, the effect of anesthetic strategy differed according to the Mini-Mental State Examination, but not the Charlson Comorbidity Index or age. Two strokes occurred among patients receiving spinal anesthesia and one death among patients receiving general anesthesia.

**Conclusions:** Spinal anesthesia with targeted sedation based on BIS values compared with general anesthesia with masked BIS values did not reduce delirium after lumbar fusion.

(ANESTHESIOLOGY 2021; 135:992–1003)

Postoperative delirium is common in older adults after surgery, with estimates of 10 to 50% depending on the type of surgery.<sup>1–3</sup> Although previously thought to be transient with few long-term effects, it is now recognized that postoperative delirium is associated with important sequelae, including increased duration of hospitalization,<sup>4,5</sup> decreased functional status,<sup>6,7</sup> and cognitive decline.<sup>8,9</sup> Despite its significance, there are few effective treatment strategies, and so prevention of delirium is paramount.<sup>3</sup>

In the intensive care unit, reducing the level of sedation has been associated with less delirium.<sup>10</sup> However, in the operating room, it is unclear whether a parallel strategy to reduce depth of anesthesia and anesthetic exposure is effective, as the results of previous trials have been promising, but conflicting.<sup>11–16</sup> One limitation is that most previous studies were conducted in patients undergoing general anesthesia with the goal of limiting excessive depth of anesthesia and anesthetic exposure,<sup>11–14</sup> and the effectiveness of strategies

to avoid general anesthesia and target lighter sedation has not been well studied. Although two additional trials did examine the benefits of lighter sedation during hip fracture surgery under spinal anesthesia, the results may not be generalizable to most older adults undergoing surgery, since a substantial number of patients were cognitively impaired.<sup>15,16</sup>

Thus, there is a clear need to establish whether reducing depth of anesthesia and anesthetic exposure (beyond levels consistent with general anesthesia) can reduce delirium after surgery in a representative population of older adults. This question is highly applicable since many of the most common surgeries in older adults can be performed using neuraxial/regional approaches.<sup>17</sup> Lumbar spine fusion surgery is one such surgery that is among the top five most frequent surgeries in older adults,<sup>17</sup> with an estimated incidence of postoperative delirium of 10 to 30%.<sup>18–20</sup> Therefore, we conducted a randomized pragmatic trial in older patients undergoing lumbar spine surgery, with the hypothesis that a bundled approach to reduce anesthetic agent exposure as determined by Bispectral Index [BIS] values (spinal anesthesia with targeted light sedation based on BIS values) compared with general anesthesia with masked BIS values would reduce the incidence of postoperative delirium.

## Materials and Methods

### Study Design

The research protocol was approved by the Mercy Medical Center (Baltimore, Maryland) Institutional Review Board (No. 2015–45). The trial was registered at ClinicalTrials.gov (NCT03133845, Principal Investigator Charles Brown). The initial protocol was released by the investigators to ClinicalTrials.gov on October 23, 2015. Due to quality control issues (in particular, the specificity of some outcomes, most notably post-discharge secondary outcomes that are not reported in this manuscript), the protocol was not formally registered and released to the public until April 2017, so the formal registration was retrospective to the start of the trial. The primary aim and outcome as reported in this manuscript have been unchanged

since the initial submission to ClinicalTrials.gov on October 23, 2015. However, the secondary delirium outcomes (delirium severity and number of days of delirium) were not formally added to the trial registration until April 2017, although these outcomes were collected since the start of the trial as part of the study protocol. Other changes in enrollment criteria and sample size calculation are described below. Participants provided written informed consent. The SHaping Anesthetic techniques to Reduce Postoperative delirium (SHARP) study was conducted as a single-center prospective randomized controlled superiority trial with two parallel groups. The protocol was published near the end of the trial to summarize the conduct of the trial and provide the final statistical plan.<sup>21</sup>

### Participants

Patients were approached before scheduled surgery by a research coordinator to evaluate eligibility and obtain informed consent. Inclusion criteria were (1) age 65 yr or greater; (2) undergoing lumbar spine fusion; (3) expected surgery duration less than 3 h; (4) under the care of a participating surgeon; and (5) ability to understand and comply with study procedures. Exclusion criteria were (1) contraindications to spinal anesthesia (*e.g.*, severe aortic stenosis, anticoagulant therapy); (2) body mass index greater than 40 kg/m<sup>2</sup>; (3) previous L2–L5 full lumbar fusion; (4) communication issues precluding baseline assessments; (5) baseline dementia or Mini-Mental State Examination less than 24; (6) psychiatric disease precluding cooperation with sedation; and (7) surgeon or anesthesiologist preference for either anesthetic approach for any reason due to clinical considerations. Delirium was not formally assessed, although all patients were assessed for capacity to consent. Patients were enrolled between September 2015 to May 2019. Eligibility criteria were expanded after the study began to allow slightly younger patients, a higher body mass index, and longer duration of surgery. The specific criteria that were changed were a decrease in the lower age limit from 70 yr to 65 yr, an increase in the upper limit of body mass index (from 35 kg/m<sup>2</sup> to 40 kg/m<sup>2</sup>), and an increase in the upper limit of anticipated surgery duration (from 2 h to 3 h).

### Randomization and Assignment of Intervention

A computer-generated simple randomization list with 1:1 allocation was created by a research nurse before the study. For allocation concealment, assignments were placed in sealed opaque envelopes, which were sequentially handed to clinicians after randomization, before entering the operating room.

### Intervention and Control

The intervention group received spinal anesthesia with targeted depth of anesthesia based on BIS values. The BIS monitor is approved to monitor depth of anesthesia and displays a unitless number (0 to 100) derived from processed electroencephalogram waveforms. BIS values between 40 and 60 are consistent with general anesthesia.<sup>22</sup> In the

This article is featured in "This Month in Anesthesiology," page A1. This article is accompanied by an editorial on p. 940. Supplemental Digital Content is available for this article. Direct URL citations appear in the printed text and are available in both the HTML and PDF versions of this article. Links to the digital files are provided in the HTML text of this article on the Journal's Web site ([www.anesthesiology.org](http://www.anesthesiology.org)). This article has an audio podcast. This article has a visual abstract available in the online version.

Submitted for publication November 6, 2020. Accepted for publication August 31, 2021. Published online first on October 19, 2021. From the Department of Anesthesiology and Critical Care Medicine (C.H.B., E.L.J., S.C., F.S.), Department of Medicine (L.R.Y.), and Department of Psychiatry and Behavioral Sciences (K.N.), Johns Hopkins University School of Medicine, Baltimore, Maryland; Maryland Spine Center at Mercy, Baltimore, Maryland (C.E., C.L.D.); Mercy Anesthesiology Associates, Baltimore, Maryland (C.L., M.E.); Tufts University School of Medicine, Boston, Massachusetts (Y.G.); University of Miami Miller School of Medicine, Miami, Florida (R.S.); Wake Forest School of Medicine, Winston Salem, North Carolina (D.K.); University of Maryland School of Medicine, Baltimore, Maryland (R.C., N.L.L.); Department of Biostatistics, Johns Hopkins Bloomberg School of Public Health, Baltimore, Maryland (E.C.); and the Department of Anesthesiology, Northwestern Feinberg School of Medicine, Chicago, Illinois (C.W.H.).

intervention group, spinal anesthesia was obtained using intrathecal injection of bupivacaine (10 to 15 mg) or lidocaine. Patients received sedation with propofol (25 to 150 mcg · kg<sup>-1</sup> · min<sup>-1</sup>), targeted to a BIS greater than 60 to 70. However, the anesthesiologist was instructed to prioritize clinical concerns if depth of sedation needed to be increased.

In the control group, patients received general anesthesia with an endotracheal tube. Anesthesia induction was with propofol (1 to 2 mg/kg) or etomidate, maintenance with a volatile anesthetic, muscle relaxation with a nondepolarizing muscle relaxant, and analgesia with fentanyl (generally 2 to 5 mcg/kg titrated) or hydromorphone and/or morphine. Patients on baseline opioids could receive additional opioids based on clinical criteria. For patients under general anesthesia, the anesthetic provider was masked to BIS values unless there was a clinical need.

## Masking

Delirium outcome assessors were masked to the intervention. Postoperative data were abstracted from the electronic medical record by staff masked to the intervention. Patients, surgeons, and anesthesiologists were not masked, because it is impossible for the anesthetic technique to be masked to treating physicians or patients. Statisticians and investigators involved in data analysis were masked.

## Perioperative Management

Perioperative care was based on established clinical protocols. Patients could receive intrathecal morphine during spinal anesthesia at the discretion of the anesthesiologist, or by direct intraoperative injection at the discretion of the surgeon. Postoperative analgesia was with fentanyl or hydromorphone patient-controlled analgesia, with transition to oxycodone or other oral opioids as tolerated.

## Outcomes and Other Covariates

Delirium was assessed once daily during the first 3 postoperative days in the hospital using the validated Confusion Assessment Method<sup>23</sup> (sensitivity, 94 to 100%; specificity, 90 to 95%). For purposes of missing data, daily in-hospital assessments were not considered missing if the patient was discharged from the hospital on that day and not available for assessment. The Confusion Assessment Method included formal tests of cognition (Mini-Mental State Examination,<sup>24</sup> Calendar Reverse Months, Shortened Digit Span Forward/Reverse, and Delayed Word Recall tests) as well as questions for nurses, clinicians, and family. Patients who refused an assessment and no delirium assessment could be made were considered to not have delirium for that assessment. The primary outcome was incident delirium as defined by any positive assessment during hospitalization. A chart review for delirium was also conducted using validated methods to supplement in-person assessments.<sup>25</sup> Secondary outcomes included delirium duration and severity (Delirium Rating Scale-Revised 98).<sup>26</sup> Covariate information was collected from baseline assessments, patient report, and the medical record. Instrumental

activities of daily living were measured at baseline.<sup>27</sup> Number of surgical levels included the range of involved vertebrae.

## Sample Size

At the start of the trial, we assumed a delirium incidence of 40% in the control group (general anesthesia with masked BIS values) and a 50% reduction in the intervention group, based on previous studies.<sup>15,18</sup> Further, we assumed a 4 to 6% dropout or crossover. With these assumptions, 190 patients would be needed to show a difference in incidence of delirium at a 0.05 significance level with a power of 0.8. After the first year of data collection, the delirium incidence was noted to be less than predicted, and so the sample size was increased to at least 218, based on a revised assumption of delirium incidence (40% to 35% in the control arm) and similar assumptions regarding 50% reduction in delirium in the intervention group and 4 to 6% dropout.

## Statistical Analysis

The primary analysis was based on the intention to treat principle (patients included in the group to which randomized). For the primary outcome, incident delirium, both the absolute difference and relative change were computed. The chi-square test was used to compare proportions with the primary outcome between groups. Secondary outcomes were compared using Wilcoxon rank sum tests. Normally distributed variables are reported using mean ± SD, and nonnormally distributed variables are reported using mean and interquartile range. Adjusted analyses were conducted with multivariable logistic regression to account for potential confounding, first with prespecified adjustment for age, education, and cognitive score<sup>28</sup> and second with adjustment for additional variables associated with delirium in bivariate analyses. As-treated analyses were also conducted (patients included in the group to which they received treatment). Standard diagnostics, including goodness of fit, influence, and collinearity, were examined for all regression models. BIS data were downloaded from the monitor after surgery and were analyzed in several ways, including the mean ± SD and minutes below or above clinically relevant cutoffs (BIS less than 40 and BIS greater than 55), based on the methodology of previous studies.<sup>11,16</sup>

Prespecified subgroup analyses were conducted based on stratification by age (less than 75 *vs.* 75 yr old or greater), Charlson Comorbidity Index (0 *vs.* 1 or greater), and baseline cognition (Mini-Mental State Examination less than 27 *vs.* 27 or greater), with cutoffs chosen based on biologic relevance and/or to have anticipated sufficient number of patients in the subgroups.<sup>16,29,30</sup> *Post hoc*, we examined four subgroups identified based on differences in bivariate analyses. Relative risks were calculated within each subgroup, and 95% CIs were generated using the percentile method *via* a bootstrap procedure (5,000 bootstrap samples). The hypothesis that the intervention would have differential effect based on subgroups was formally tested using a *P* value for interaction, without adjustment for other covariates. SAS v9.4 (USA) was used. Formal interim analyses were to assess

recruitment, safety events, and dropout, but not efficacy, and a Data Safety and Monitoring Board monitored study conduct and safety. There were no prespecified stopping criteria, and enrollment ceased when the target sample size was obtained. In all analyses,  $P < 0.05$  was considered significant, and all hypothesis testing was two-tailed.

## Results

A patient flow diagram is shown in figure 1. Of 799 patients screened from September 8, 2015, to May 6, 2019, 111 patients were randomized to spinal anesthesia with targeted sedation based on BIS values, and 108 patients were randomized to general anesthesia with masked BIS values. Reasons that patients were not enrolled and randomized are listed in figure 1. Enrollment was stopped upon accrual of enrollment goals. Among patients randomized to spinal anesthesia with targeted sedation based on BIS values, an adequate level of spinal anesthesia could not be obtained in seven patients, and these patients crossed over to receive general anesthesia. Among patients randomized to general anesthesia with masked BIS values, two patients withdrew after randomization, and one patient crossed over to receive spinal anesthesia.

### Baseline Patient Characteristics

The median age of patients in this study was 72 yr (interquartile range, 69 to 77), 38% were male, and the median Mini-Mental State Examination score was 29 (interquartile range, 27 to 29). Patients rated their average preoperative pain as a median of 7 (interquartile range, 5 to 8) and their current pain as a median of 3 (interquartile range, 1 to 6). Patient characteristics were generally similar in the two arms of the study (table 1). However, the Charlson Comorbidity Index was slightly higher and there were more patients with a previous myocardial infarction and atrial fibrillation in the spinal anesthesia with targeted sedation based on BIS values group.

### Perioperative Characteristics and Separation in BIS Values

Intra- and postoperative characteristics are described in table 2 (intention to treat) and Supplemental Digital Content table 1 (<http://links.lww.com/ALN/C700>; as treated). Overall, the median length of surgery was 128 min (interquartile range, 106 to 159), the median number of spinal levels was 3 (interquartile range, 2 to 4), and the median estimated blood loss was 300 ml (interquartile range, 200 to 460). In the spinal anesthesia with targeted sedation based on BIS values group, the median dose of bupivacaine was 14 mg (interquartile range, 12.5 to 15), and the maximum propofol infusion rate was a median of 80 mcg · kg<sup>-1</sup> · min<sup>-1</sup> (interquartile range, 75 to 100). Among patients who received general anesthesia, desflurane was predominantly utilized. Patients in the general anesthesia with masked BIS values group received more fentanyl and less IV fluids.

The average BIS value in the spinal anesthesia with targeted sedation based on BIS values group was higher than in the

general anesthesia with masked BIS values group (median of 62 [interquartile range, 53 to 70] *vs.* 45 [interquartile range, 41 to 50];  $P < 0.001$ ). The median duration of BIS less than 40 was substantially lower in the spinal anesthesia with targeted sedation based on BIS values group compared to the general anesthesia with masked BIS values group (3 min [interquartile range, 0 to 22] *vs.* 68 min [interquartile range, 22 to 102];  $P < 0.001$ ).

### Effect of the Intervention on Postoperative Delirium and Other Outcomes

The overall incidence of delirium was 22% (48 of 217). Out of 544 opportunities for delirium assessments for nondischarged patients, 509 in-person assessments were completed, and 24 assessments were refused by patients. Two patients refused all assessments. In the intention to treat analysis, there was no significant difference in the incidence of delirium in the spinal anesthesia with targeted sedation based on BIS values group (25.2% [28 of 111]) compared with the general anesthesia with masked BIS values group (18.9% [20 of 106];  $P = 0.259$ ), absolute difference, 6.4% (95% CI, -4.6 to 17.4%), and relative risk, 1.22 (95% CI, 0.85 to 1.76). When a chart review delirium method was used to supplement the in-person assessments, there was no significant difference in the incidence of delirium in the spinal anesthesia with targeted sedation based on BIS values group (27.9% [31 of 111]) compared with the general anesthesia with masked BIS values group (23.6% [25 of 106];  $P = 0.465$ ). Similarly, there was no difference by group in the incidence of delirium for each individual postoperative day or in maximum delirium severity score (table 3 [intention to treat]; Supplemental Digital Content table 2, [<http://links.lww.com/ALN/C700>; as treated]). The incidence of delirium was also not different between groups when adjusted for variables associated with delirium in bivariate analyses (Supplemental Digital Content table 3, <http://links.lww.com/ALN/C700>).

Duration of recovery in the postanesthesia care unit was similar between the two groups, but pain at postanesthesia care unit discharge was lower in the spinal anesthesia with targeted sedation based on BIS values group compared with the general anesthesia with masked BIS values group (median, 4 [interquartile range, 1 to 5] *vs.* median, 5 [interquartile range, 3 to 7];  $P = 0.004$ ). There were two strokes in the spinal anesthesia with targeted sedation based on BIS values group, and there was one death in the general anesthesia with masked BIS values group. Other complications by randomization group are listed in table 2 (intention to treat) and Supplemental Digital Content table 1 (<http://links.lww.com/ALN/C700>; as treated).

### Prespecified Subgroup Analyses

There were three prespecified subgroup analyses, based on cutoffs of the Mini-Mental State Examination, the Charlson Comorbidity Index, and age, with forest plot results by the primary intention to treat analysis shown in figure 2. (The forest plot for the as treated analysis, as well as an expanded description of the numbers of events in each subgroup, are shown in Supplemental Digital Content figure 1 and Supplemental Digital Content table 4, respectively, [Brown et al.](http://</a></p>
</div>
<div data-bbox=)



# CONSORT

TRANSPARENT REPORTING of TRIALS

## CONSORT 2010 Flow Diagram

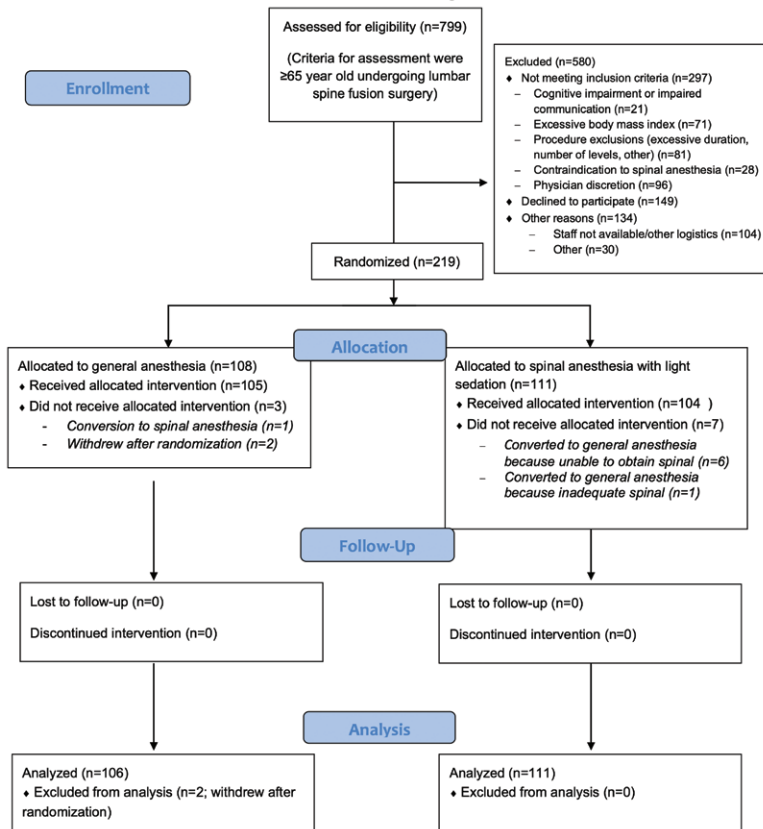

**Fig. 1.** Consolidated Standards of Reporting Trials (CONSORT) diagram. A patient flow diagram is shown.

links.lww.com/ALN/C700). Baseline Mini-Mental State Examination did moderate the effect of the intervention ( $P$  interaction = 0.009). Specifically, for patients with Mini-Mental State Examination less than 27, the incidence of delirium was less in the spinal anesthesia with targeted sedation based on BIS values group compared to the general anesthesia with masked BIS values group (17.7% [3 of 17] *vs.* 43.5% [10 of 23]). On the other hand, for patients with Mini-Mental State Examination 27 or greater, the incidence of delirium was greater in the spinal anesthesia with targeted sedation based on BIS values group *versus* the general anesthesia with masked BIS values group (26.6% [25 of 94] *vs.* 12.1% [10 of 83]). There was no difference in the effect of the intervention (*i.e.*, no interaction) based on the other prespecified subgroups of age strata (less than 75 *vs.* 75 yr old or greater) or Charlson Comorbidity Index (0 *vs.* 1 or greater). Several other subgroup analyses were chosen *post hoc* (sex, education, use of short-acting opioids at baseline, and administration of intrathecal morphine during surgery; fig. 2). Intrathecal morphine did modify the effect of the intervention in the intention to treat

analysis ( $P$  interaction = 0.029) but not in the as treated analysis ( $P$  interaction = 0.088). Specifically, for patients who did not receive intrathecal morphine, the incidence of delirium in the intention to treat analysis was less in the spinal anesthesia with targeted sedation based on BIS values group compared to the general anesthesia with masked BIS values group (8.8% [3 of 34] *vs.* 20.4% [10 of 49]). On the other hand, for patients who did receive intrathecal morphine, the incidence of delirium was greater in the spinal anesthesia with targeted sedation based on BIS values group *versus* the general anesthesia with masked BIS values group (32.5% [25 of 77] *vs.* 17.5% [10 of 57]).

## Risk Factors for Delirium

In bivariate analyses, male sex, lower Mini-Mental State Examination score, higher Charlson Comorbidity Index, preoperative short-acting opioid medication, longer surgery, and increased postoperative pain were among the variables associated with delirium (Supplemental Digital

**Table 1.** Baseline Patient Characteristics

|                                                                                                       | Total<br>(n = 217)* | General Anesthesia<br>with Masked BIS<br>Values (n = 106) | Spinal Anesthesia with<br>Targeted Sedation Based on<br>BIS Values (n = 111) |
|-------------------------------------------------------------------------------------------------------|---------------------|-----------------------------------------------------------|------------------------------------------------------------------------------|
| Age (yr), median (interquartile range)                                                                | 72 (69–77)          | 72 (69–76)                                                | 73 (69–78)                                                                   |
| Male, n (%)                                                                                           | 83 (38.2)           | 35 (33.0)                                                 | 48 (43.2)                                                                    |
| Race, n (%)                                                                                           |                     |                                                           |                                                                              |
| White                                                                                                 | 197 (90.8)          | 93 (87.7)                                                 | 104 (93.7)                                                                   |
| Black                                                                                                 | 20 (9.2)            | 13 (12.3)                                                 | 7 (6.3)                                                                      |
| Education college or higher, n (%)                                                                    | 104 (47.9)          | 49 (46.2)                                                 | 55 (49.5)                                                                    |
| Living arrangement, at home, n (%)                                                                    | 203 (94.4)          | 95 (91.3)                                                 | 108 (97.3)                                                                   |
| Mini-Mental State Examination,† median (interquartile range)                                          | 29 (27–29)          | 28 (27–29)                                                | 29 (27–29)                                                                   |
| Instrumental Activities of Daily Living,‡ median (interquartile range)                                | 13 (12–14)          | 13 (12–14)                                                | 13 (12–14)                                                                   |
| Comorbidities, n (%)                                                                                  |                     |                                                           |                                                                              |
| Previous stroke                                                                                       | 3 (1.4)             | 2 (1.9)                                                   | 1 (0.9)                                                                      |
| Hypertension                                                                                          | 157 (72.4)          | 74 (69.8)                                                 | 83 (74.8)                                                                    |
| Atrial fibrillation                                                                                   | 12 (5.5)            | 2 (1.9)                                                   | 10 (9.0)                                                                     |
| Congestive heart failure                                                                              | 1 (0.5)             | 0 (0)                                                     | 1 (0.9)                                                                      |
| Myocardial infarction                                                                                 | 20 (9.2)            | 5 (4.7)                                                   | 15 (13.5)                                                                    |
| Peripheral vascular disease                                                                           | 9 (4.1)             | 1 (0.9)                                                   | 8 (7.2)                                                                      |
| Chronic obstructive pulmonary disease                                                                 | 22 (10.1)           | 10 (9.4)                                                  | 12 (10.8)                                                                    |
| Tobacco (previous)                                                                                    | 73 (33.6)           | 33 (31.1)                                                 | 40 (36)                                                                      |
| Diabetes                                                                                              | 54 (24.9)           | 25 (23.6)                                                 | 29 (26.1)                                                                    |
| Chronic kidney disease                                                                                | 38 (17.5)           | 15 (14.2)                                                 | 23 (20.7)                                                                    |
| ASA Status,§ median (interquartile range)                                                             | II (II–III)         | II (II–III)                                               | II (II–III)                                                                  |
| Charlson Comorbidity Index,   median (interquartile range)                                            | 1 (0–1)             | 0 (0–1)                                                   | 1 (0–1)                                                                      |
| Hemoglobin (g/dl), mean ± SD                                                                          | 13.5 ± 1.3          | 13.6 ± 1.2                                                | 13.5 ± 1.4                                                                   |
| Baseline medications                                                                                  |                     |                                                           |                                                                              |
| Aspirin, n (%)                                                                                        | 21 (9.8)            | 12 (11.5)                                                 | 9 (8.1)                                                                      |
| β-Blockers, n (%)                                                                                     | 56 (26)             | 21 (20.2)                                                 | 35 (31.5)                                                                    |
| Calcium channel blockers, n (%)                                                                       | 51 (23.7)           | 22 (21.2)                                                 | 29 (26.1)                                                                    |
| Angiotensin-converting enzyme inhibitors, n (%)                                                       | 43 (20)             | 17 (16.3)                                                 | 26 (23.4)                                                                    |
| Angiotensin II-receptor blockers, n (%)                                                               | 49 (22.8)           | 26 (25)                                                   | 23 (20.7)                                                                    |
| Statin, n (%)                                                                                         | 109 (50.7)          | 55 (52.9)                                                 | 54 (48.6)                                                                    |
| Selective serotonin reuptake inhibitors or serotonin and<br>norepinephrine reuptake inhibitors, n (%) | 39 (18.1)           | 20 (19.2)                                                 | 19 (17.1)                                                                    |
| Other psychotropic medication, n (%)                                                                  | 23 (10.7)           | 9 (8.7)                                                   | 14 (12.6)                                                                    |
| Short-acting opioids, n (%)                                                                           | 106 (49.3)          | 44 (42.3)                                                 | 62 (55.9)                                                                    |
| Current pain,# median (interquartile range)                                                           | 3 (1–6)             | 3 (1–7)                                                   | 3 (0–5)                                                                      |
| Average pain,# median (interquartile range)                                                           | 7 (5–8)             | 7 (5–8)                                                   | 8 (5–8)                                                                      |

\*All variables were complete (n = 217) except the following: Instrument Activities of Daily Living, ASA score (n = 211), current and average pain (n = 212), living status (n = 203), all baseline medications (n = 215), hemoglobin (n = 216). †Mini-Mental State Examination scores range from 0 to 30, with higher scores indicating better performance. ‡Instrumental Activities of Daily Living scores range from 0 to 14 with higher scores indicating better functional status. §For non-brain dead surgical patients, ASA scores range from I to V with higher scores indicating greater comorbidities. ||The Charlson Comorbidity Index ranges from 0 to 33, with higher scores indicating greater risk of long-term mortality. #Pain is rated on a scale of 0 to 10, with higher scores indicating more pain.

ASA, American Society of Anesthesiologists; BIS, Bispectral Index.

Content tables 5 and 6, <http://links.lww.com/ALN/C700>). In adjusted models (Supplemental Digital Content table 3, <http://links.lww.com/ALN/C700>), only lower Mini-Mental State Examination score remained independently associated with delirium. The administration of intrathecal morphine was also associated with delirium in the adjusted model, but not in the bivariate comparison.

## Discussion

The results of this trial demonstrate that spinal anesthesia with targeted sedation based on BIS values compared with general anesthesia with masked BIS values does not reduce the incidence of delirium in lumbar spine surgery patients.

The results of this study add to several studies examining whether titrating depth of anesthesia and anesthetic exposure compared with usual care can reduce delirium. Early trials in general anesthesia patients suggested that a strategy to reduce anesthetic exposure based on BIS values could reduce delirium.<sup>11,12</sup> Based on these and other studies, delirium guidelines have recommended depth of anesthesia monitoring may be considered.<sup>1</sup> However, the recent large trial reported no difference in delirium in patients randomized to a strategy of avoiding excessive anesthetic exposure and burst suppression on the electroencephalogram.<sup>14</sup> Similarly, the results of the current study demonstrate that a bundled approach to reduce anesthetic agent exposure as determined by BIS values does not reduce the

**Table 2.** Perioperative and Postoperative Characteristics by Randomization Group

|                                                                                                       | Overall<br>(n = 217)* | General Anesthesia<br>with Masked BIS<br>Values (n = 106) | Spinal Anesthesia with<br>Targeted Sedation Based<br>on BIS Values (n = 111) | P Value        |
|-------------------------------------------------------------------------------------------------------|-----------------------|-----------------------------------------------------------|------------------------------------------------------------------------------|----------------|
| <b>Intraoperative</b>                                                                                 |                       |                                                           |                                                                              |                |
| Duration of surgery (min), median (interquartile range)                                               | 128 (106–159)         | 130 (110–163)                                             | 123 (102–154)                                                                | 0.262          |
| Number of levels, median (interquartile range)                                                        | 3 (2–4)               | 3 (2–3)                                                   | 3 (2–4)                                                                      | 0.425          |
| <b>Anesthetic management</b>                                                                          |                       |                                                           |                                                                              |                |
| <b>Spinal anesthesia arm</b>                                                                          |                       |                                                           |                                                                              |                |
| Bupivacaine dose (mg), median (interquartile range)                                                   | 14 (12.5–15)          | Not applicable                                            | 14 (12.5–15)                                                                 | Not applicable |
| Maximum propofol infusion (mcg · kg <sup>-1</sup> · min <sup>-1</sup> ), median (interquartile range) | 80 (75–100)           | Not applicable                                            | 80 (75–100)                                                                  | Not applicable |
| <b>General anesthesia arm</b>                                                                         |                       |                                                           |                                                                              |                |
| Desflurane, n (%)                                                                                     | 82 (37.8)             | 77 (72.6)                                                 | Not applicable                                                               | Not applicable |
| Intrathecal morphine, n (%)                                                                           | 134 (61.8)            | 57 (53.8)                                                 | 77 (69.4)                                                                    | 0.018          |
| Intrathecal morphine (mg), median (interquartile range)                                               | 0.2 (0.2–0.2)         | 0.2 (0.2–0.2)                                             | 0.2 (0.2–0.2)                                                                | 0.019          |
| Fentanyl, n (%)                                                                                       | 203 (93.5)            | 100 (94.3)                                                | 103 (92.8)                                                                   | 0.643          |
| Fentanyl (mcg), median (interquartile range)                                                          | 150 (100–250)         | 200 (150–250)                                             | 100 (100–100)                                                                | < 0.001        |
| Hydromorphone, n (%)                                                                                  | 43 (19.8)             | 40 (37.7)                                                 | 3 (2.7)                                                                      | < 0.001        |
| Hydromorphone (mg), median (interquartile range)                                                      | 1.5 (1–2)             | 1.3 (1–2)                                                 | 2 (1–2)                                                                      | 0.449          |
| Midazolam, n (%)                                                                                      | 69 (31.8)             | 33 (31.1)                                                 | 36 (32.4)                                                                    | 0.837          |
| Midazolam (mg), median (interquartile range)                                                          | 2 (2–2)               | 2 (2–2)                                                   | 2 (2–2)                                                                      | 0.554          |
| Phenylephrine, n (%)                                                                                  | 50 (23.0)             | 23 (21.7)                                                 | 27 (24.3)                                                                    | 0.646          |
| Phenylephrine (mcg), median (interquartile range)                                                     | 300 (200–650)         | 300 (50–450)                                              | 250 (150–750)                                                                | 0.611          |
| Ephedrine, n (%)                                                                                      | 140 (64.5)            | 68 (64.2)                                                 | 72 (64.9)                                                                    | 0.913          |
| Ephedrine (mg), median (interquartile range)                                                          | 20 (10–33)            | 25 (13–40)                                                | 20 (10–30)                                                                   | 0.055          |
| Fluids administered (ml), median (interquartile range)                                                | 2,000 (1,700–2,700)   | 2,000 (1,400–2,600)                                       | 2,050 (1,900–2,950)                                                          | 0.006          |
| Estimated blood loss (ml), median (interquartile range)                                               | 300 (200–460)         | 300 (200–500)                                             | 300 (200–400)                                                                | 0.648          |
| Packed erythrocyte transfusion, n (%)                                                                 | 4 (1.8)               | 1 (0.9)                                                   | 3 (2.7)                                                                      | 0.622          |
| Lowest MAP (mm Hg), median (interquartile range)                                                      | 59 (52–64)            | 59 (51–64)                                                | 60 (52–64)                                                                   | 0.672          |
| Average BIS, median (interquartile range)                                                             | 51 (44–63)            | 45 (41–50)                                                | 62 (53–70)                                                                   | < 0.001        |
| Duration of BIS < 40 (min), median (interquartile range)                                              | 22 (1–76)             | 68 (22–102)                                               | 3 (0–22)                                                                     | < 0.001        |
| Duration of BIS > 55 (min), median (interquartile range)                                              | 31 (16–92)            | 20 (13–30)                                                | 87 (34–110)                                                                  | < 0.001        |
| Duration of PACU (min), median (interquartile range)                                                  | 119 (75–164)          | 119 (75–169)                                              | 118 (75–160)                                                                 | 0.530          |
| Pain score at PACU discharge, median (interquartile range)                                            | 4 (2–6)               | 5 (3–7)                                                   | 4 (1–5)                                                                      | 0.004          |
| <b>Postoperative</b>                                                                                  |                       |                                                           |                                                                              |                |
| ICU admission, n (%)                                                                                  | 4 (1.8)               | 0 (0)                                                     | 4 (3.6)                                                                      | 0.122          |
| Duration of hospitalization (days), median (interquartile range)                                      | 3 (2–3)               | 3 (2–3)                                                   | 3 (2–3)                                                                      | 0.087          |
| Maximum pain on postoperative day 1 (0–10), median (interquartile range)                              | 8 (7–10)              | 8 (7–10)                                                  | 8 (7–10)                                                                     | 0.413          |
| <b>Complications,† n (%)</b>                                                                          |                       |                                                           |                                                                              |                |
| Stroke                                                                                                | 2 (0.9)               | 0 (0)                                                     | 2 (1.8)                                                                      | 0.498          |
| Atrial fibrillation                                                                                   | 1 (0.5)               | 0 (0)                                                     | 1 (0.9)                                                                      | 1.000          |
| Congestive heart failure                                                                              | 0 (0)                 | 0 (0)                                                     | 0 (0)                                                                        | Not applicable |
| Myocardial infarction                                                                                 | 1 (0.5)               | 0 (0)                                                     | 1 (0.9)                                                                      | 1.000          |
| Sepsis                                                                                                | 0 (0)                 | 0 (0)                                                     | 0 (0)                                                                        | Not applicable |
| Pneumonia                                                                                             | 2 (0.9)               | 0 (0)                                                     | 2 (1.8)                                                                      | 0.498          |
| Urinary tract infection                                                                               | 18 (8.3)              | 9 (8.5)                                                   | 9 (8.1)                                                                      | 0.919          |
| Pulmonary embolism or deep venous thrombosis                                                          | 2 (0.9)               | 1 (0.9)                                                   | 1 (0.9)                                                                      | 1.000          |
| Acute kidney injury                                                                                   | 1 (0.5)               | 0 (0)                                                     | 1 (0.9)                                                                      | 1.000          |
| Fail                                                                                                  | 0 (0)                 | 0 (0)                                                     | 0 (0)                                                                        | Not applicable |
| Reoperation                                                                                           | 1 (0.5)               | 0 (0)                                                     | 1 (0.9)                                                                      | 1.000          |
| In-hospital death                                                                                     | 1 (0.5)               | 1 (0.9)                                                   | 0 (0)                                                                        | 0.488          |

\*All variables were complete except bupivacaine and propofol dose in the spinal anesthesia group (n = 101), BIS values (n = 192), and postoperative day 1 pain (n = 216). †Some patients experienced multiple complications, apart from urinary tract infections. One patient in the general anesthesia group had a pulmonary embolism and died. One patient in the spinal anesthesia group had a stroke, myocardial infarction, and pneumonia.

BIS, Bispectral Index; ICU, intensive care unit; MAP, mean arterial pressure; PACU, postanesthesia care unit.

incidence of delirium in older adults undergoing lumbar spine fusion surgery.

An important consideration in interpreting previous studies is that in most trials, all patients received general anesthesia. The pertinent comparisons were general anesthesia *versus* deeper general anesthesia, and the benefits of lighter

anesthesia could not be examined. This is an important gap since critical care guidelines recommend that mechanically ventilated patients in the intensive care unit benefit from light sedation,<sup>31</sup> a level of consciousness that is substantially more alert than general anesthesia. Two trials in hip fracture surgery patients under spinal anesthesia examined benefits

**Table 3.** Effect of the Intervention on Postoperative Delirium

|                                                                                                                             | General Anesthesia with<br>Masked BIS Values (n = 106) | Spinal Anesthesia with Targeted<br>Sedation Based on BIS Values (n = 111) | P Value |
|-----------------------------------------------------------------------------------------------------------------------------|--------------------------------------------------------|---------------------------------------------------------------------------|---------|
| Any delirium, n (%) <sup>*</sup>                                                                                            | 20 (18.9)                                              | 28 (25.2)                                                                 | 0.259   |
| Number of days of delirium, among delirious patients, median (interquartile range)                                          | 1 (1–3)                                                | 1 (1–2)                                                                   | 0.224   |
| Delirium by postoperative day <sup>*</sup>                                                                                  |                                                        |                                                                           |         |
| Day 1, n (%)                                                                                                                | 7 (6.6)                                                | 15 (13.5)                                                                 | 0.092   |
| Day 2, n (%)                                                                                                                | 15 (14.2)                                              | 22 (19.8)                                                                 | 0.267   |
| Day 3, n (%)                                                                                                                | 11 (10.4)                                              | 14 (12.6)                                                                 | 0.606   |
| Maximum delirium severity score as measured by Delirium Rating Scale–Revised–98,† median (interquartile range) <sup>*</sup> | 4 (3–6)                                                | 5 (3–8)                                                                   | 0.276   |
| Maximum delirium severity score as measured by Delirium Rating Scale–Revised–98 by postoperative day <sup>*</sup>           |                                                        |                                                                           |         |
| Day 1, median (interquartile range)                                                                                         | 3 (2–6)                                                | 4 (3–7)                                                                   | 0.088   |
| Day 2, median (interquartile range)                                                                                         | 3 (1.5–5)                                              | 3 (2–6)                                                                   | 0.354   |
| Day 3, median (interquartile range)                                                                                         | 3 (1–5)                                                | 3 (1–6)                                                                   | 0.960   |

<sup>\*</sup>Out of 544 opportunities for delirium assessments for nondischarged patients at assessment, 509 in-person assessments were completed, and 24 assessments were refused by patients. A total of 215 patients had a postoperative assessment with the Confusion Assessment Method and Delirium Rating Scale–Revised–98 (two patients refused all assessments and were considered to not have delirium). For each postoperative day, the number of patients with a Confusion Assessment Method and Delirium Rating Scale–Revised–98 evaluation among the number of nondischarged patients at assessment was 199/217 (postoperative day 1), 190/198 (postoperative day 2), and 120/129 (postoperative day 3).

†Delirium Rating Scale–Revised–98 severity scores range from 0 to 39, with higher scores indicating greater severity of delirium.

of intraoperative “light” sedation.<sup>15,16</sup> However, the results of these two studies were conflicting, and moreover, the elderly, frail, and cognitively impaired populations may not be generalizable to most older adults undergoing surgery. Thus, there has been a clear need to determine whether reducing depth of anesthesia beyond general anesthesia could reduce delirium in a generalizable population of older adults. This question is highly relevant since many surgeries can be performed

with neuraxial or regional approaches. The SHARP study addressed this question in a pragmatic manner and demonstrated no delirium reduction in patients treated with spinal anesthesia with targeted sedation based on BIS values compared with general anesthesia with masked BIS values.

One of three preplanned subgroup analyses showed different effects of the intervention according to baseline cognition. Specifically, for patients with Mini-Mental State

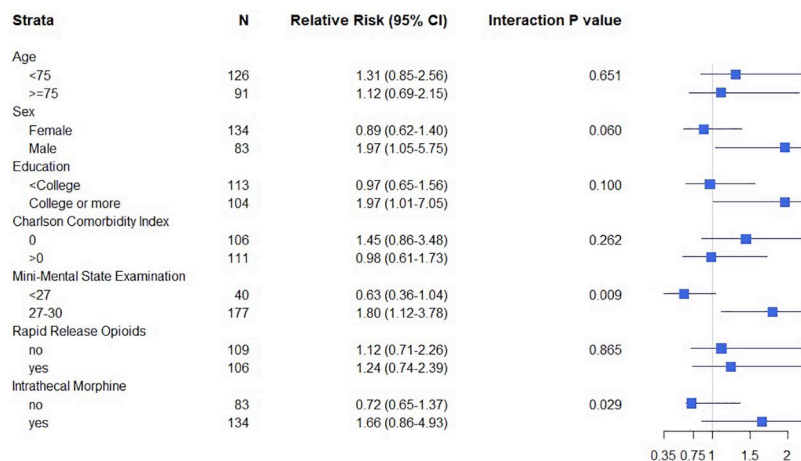

**Fig. 2.** Subgroup analyses of the primary outcome of incident delirium. Subgroup analyses based on intention to treat analyses with the primary outcome of incident delirium. Prespecified subgroup analyses were conducted based on stratification by age, Charlson Comorbidity Index, and baseline cognition. *Post hoc*, four subgroups were identified based on differences in bivariate analyses. The effect of anesthetic approach (relative risk [95% CI]) is presented separately in each subgroup to define the effect of the intervention in that particular subgroup. The interaction term is a test of significance for whether the effect of anesthetic approach is statistically different between subgroups. Rapid release opioids refer to baseline opioids. Relative risk less than 1 favors spinal anesthesia with targeted sedation based on Bispectral Index values. Relative risk greater than 1 favors general anesthesia with masked Bispectral Index values.



Examination less than 27, there was less delirium in the spinal anesthesia with targeted sedation based on BIS values group, while for patients with Mini-Mental State Examination 27 or greater, there was less delirium in the general anesthesia with masked BIS values group. The results of this subgroup analysis are qualitatively similar to a subgroup analysis reported in a trial of depth of sedation in hip fracture surgery patients.<sup>16</sup> In this trial in which the median Mini-Mental State Examination score was 24, the subgroup of healthy patients with a Charlson Comorbidity Index score of 0 to 1 (but not higher) had less delirium with a light *versus* deep sedation strategy. Thus, in both the hip fracture trial and the current trial, patients who were relatively healthy but with impaired cognition derived benefit from lighter sedation. These results need to be considered hypothesis-generating since they were subgroup analyses. One potential explanation is that cognitively impaired patients are more sensitive to anesthetic depth, perhaps due to underlying neurodegenerative disease.<sup>32–35</sup> On the other hand, it is not entirely clear why cognitively intact patients benefited from general anesthesia with masked BIS values. The overall risk of delirium was less in these patients, as would be expected. Future studies should examine anesthetic strategies to reduce depth of anesthesia in cognitively impaired older adults, although the logistics of enrolling a sufficient number of eligible patients would be challenging. A *post hoc* analysis also showed that the administration of intrathecal morphine was independently associated with delirium and modified the effects of the intervention such that in patients who received intrathecal morphine, there was less delirium in the general anesthesia with masked BIS values group. Previous work has suggested that intrathecal morphine was associated with less postoperative delirium,<sup>36</sup> while in our study, patients who received intrathecal morphine had more delirium, and the finding of this *post hoc* analysis should also be considered exploratory.

In the current study, the strongest and most consistent delirium risk factor was lower Mini-Mental State Examination score. These results are consistent with other studies examining risk factors for delirium<sup>3</sup> and highlight the importance of cognitive testing for risk stratification. Overall, pain and pain treatment were important, with baseline short-acting opioids and maximum postoperative pain being associated with delirium. These results highlight the balance of treating pain while minimizing deliriogenic opioid medication.<sup>3,37</sup>

There are several strengths of this study. The SHARP trial used a unique study design to compare spinal anesthesia with targeted sedation based on BIS values *versus* general anesthesia with masked BIS values in cognitively intact older adults. The intervention was pragmatic, conducted at a community-based hospital, and achieved a separation in BIS values. The research group is experienced in assessing postoperative delirium. Although the study sample was older adults undergoing spine surgery, results are likely generalizable to a number of surgeries for which general or neuraxial/regional anesthesia is appropriate.

There are several limitations. The intervention was bundled, and it is unclear which aspect (light sedation, spinal anesthesia,

or propofol) was most responsible for the subgroup effect. The doses of propofol that were used were relatively high, the sedation protocol was pragmatic, and a formal observer assessment of sedation was not used. Thus, a number of patients in the spinal anesthesia with targeted sedation based on BIS values group had BIS values below the target of 60 to 70, and this may have biased the results toward the null. Additionally, BIS may not be an accurate measure of depth of anesthesia in older adults. However, the majority of patients had BIS values that exceeded the upper limit of 55 that has been advocated to prevent awareness during general anesthesia.<sup>38,39</sup> The bundled approach also did not permit the use of other sedative agents, such as dexmedetomidine, and future studies are needed to examine potentially beneficial effects of dexmedetomidine in this population. The study was powered for a large effect size, based on a previous study,<sup>15</sup> and we revised the estimate of delirium incidence due to a lower incidence than originally expected. However, the overall incidence of delirium was still below the expected incidence in the power calculation, and so the study was underpowered. Nevertheless, given the observed effect, it is unlikely that a larger study would demonstrate a benefit in the intervention group. We assessed delirium only once daily, and some cases may have been missed. Thus, imprecision of the outcome assessment and/or misclassification may have biased the results. Patients in the spinal anesthesia with targeted sedation based on BIS values had more cardiac and vascular disease at baseline, although the baseline Mini-Mental State Examination was slightly higher than the general anesthesia with masked BIS values group. Perioperative management aside from the intervention was based on established protocols, and this introduced heterogeneity into the study. There was crossover between study arms in eight patients, largely due to obtaining adequate spinal anesthesia in patients with degenerative spine disease, and this is a source of bias. However, results were similar in intention to treat and as treated analyses. The Mini-Mental State Examination is a general screen of cognition and is limited by ceiling effect and educational biases.<sup>40</sup> Further, the distinction between a Mini-Mental State Examination score above and less than 27 may not be clinically meaningful, and so the results of the subgroup analyses should be considered hypothesis-generating. Finally, the trial was not formally registered in ClinicalTrials.gov until 2017 due to quality control issues, although the initial protocol with the aim and primary outcome of this manuscript was submitted in October 2015.

In conclusion, the results of the SHARP study demonstrate that spinal anesthesia with targeted sedation based on BIS values does not reduce delirium in older adults undergoing lumbar spine surgery. Further studies are needed to examine optimal anesthetic strategies in cognitively impaired patients, who are at high risk for delirium.

## Research Support

The study was funded by the National Institutes of Health (Bethesda, Maryland; NIH K76 AG057020 and NIH K23

AG051783; to Dr. Brown) and by the International Anesthesia Research Society (San Francisco, California; to Dr. Brown).

### Competing Interests

Dr. Brown has consulted for and received grant funding from Medtronic Inc. (Minneapolis, Minnesota). Dr. Neufeld has received grant funding from Hitachi Inc. (Tokyo, Japan) and consulted for Merck Inc. (Kenilworth, New Jersey). Dr. Hogue has received payment for advisory board membership from Medtronic Inc. and Edwards Lifesciences (Irvine, California). He serves on a data safety monitoring committee for Merck Inc. Dr. Cha has consulted for Avania LLC (Marlborough, Massachusetts) and MC3 Corp (Dexter, Michigan). The other authors declare no competing interests.

### Reproducible Science

Full protocol available at: [cbrownv@jhmi.edu](mailto:cbrownv@jhmi.edu). Raw data may be available with the appropriate institutional agreements at: [cbrownv@jhmi.edu](mailto:cbrownv@jhmi.edu).

### Correspondence

Address correspondence to Dr. Brown: Department of Anesthesiology and Critical Care Medicine, Johns Hopkins University School of Medicine, Zayed 6208, 1800 Orleans St., Baltimore, Maryland 21210. [cbrownv@jhmi.edu](mailto:cbrownv@jhmi.edu). This article may be accessed for personal use at no charge through the Journal Web site, [www.anesthesiology.org](http://www.anesthesiology.org).

### References

1. American Geriatrics Society Expert Panel on Postoperative Delirium in Older Adults: Postoperative delirium in older adults: Best practice statement from the American Geriatrics Society. *J Am Coll Surg* 2015; 220:136–48.e1
2. Robinson TN, Raeburn CD, Tran ZV, Angles EM, Brenner LA, Moss M: Postoperative delirium in the elderly: Risk factors and outcomes. *Ann Surg* 2009; 249:173–8
3. Inouye SK: Delirium in older persons. *N Engl J Med* 2006; 354:1157–65
4. Schubert M, Schürch R, Boettger S, Garcia Nuñez D, Schwarz U, Bettex D, Jenewein J, Bogdanovic J, Staehli ML, Spirig R, Rudiger A: A hospital-wide evaluation of delirium prevalence and outcomes in acute care patients – A cohort study. *BMC Health Serv Res* 2018; 18:550
5. Brown CH IV, Laflam A, Max L, Lyman D, Neufeld KJ, Tian J, Shah AS, Whitman GJ, Hogue CW: The impact of delirium after cardiac surgical procedures on postoperative resource use. *Ann Thorac Surg* 2016; 101:1663–9
6. Quinlan N, Rudolph JL: Postoperative delirium and functional decline after noncardiac surgery. *J Am Geriatr Soc* 2011; 59(suppl 2):301
7. Hsieh TT, Saczynski J, Gou RY, Marcantonio E, Jones RN, Schmitt E, Cooper Z, Ayres D, Wright J, Trivison TG, Inouye SK; SAGES Study Group: Trajectory of functional recovery after postoperative delirium in elective surgery. *Ann Surg* 2017; 265:647–53
8. Inouye SK, Marcantonio ER, Kosar CM, Tommet D, Schmitt EM, Trivison TG, Saczynski JS, Ngo LH, Alsop DC, Jones RN: The short-term and long-term relationship between delirium and cognitive trajectory in older surgical patients. *Alzheimers Dement* 2016; 12:766–75
9. Brown CH IV, Probert J, Healy R, Parish M, Nomura Y, Yamaguchi A, Tian J, Zehr K, Mandal K, Kamath V, Neufeld KJ, Hogue CW: Cognitive decline after delirium in patients undergoing cardiac surgery. *ANESTHESIOLOGY* 2018; 129:406–16
10. Shehabi Y, Bellomo R, Kadiman S, Ti LK, Howe B, Reade MC, Khoo TM, Alias A, Wong YL, Mukhopadhyay A, McArthur C, Seppelt I, Webb SA, Green M, Bailey MJ; Sedation Practice in Intensive Care Evaluation (SPICE) Study Investigators and the Australian and New Zealand Intensive Care Society Clinical Trials Group: Sedation intensity in the first 48 hours of mechanical ventilation and 180-day mortality: A multinational prospective longitudinal cohort study. *Crit Care Med* 2018; 46:850–9
11. Chan MT, Cheng BC, Lee TM, Gin T; CODA Trial Group: BIS-guided anesthesia decreases postoperative delirium and cognitive decline. *J Neurosurg Anesthesiol* 2013; 25:33–42
12. Radtke FM, Franck M, Lendner J, Kruger S, Wernecke KD, Spies CD: Monitoring depth of anaesthesia in a randomized trial decreases the rate of postoperative delirium but not postoperative cognitive dysfunction. *Br J Anaesth* 2013; 110(suppl 1):98
13. Whitlock EL, Torres BA, Lin N, Helsten DL, Nadelson MR, Mashour GA, Avidan MS: Postoperative delirium in a substudy of cardiothoracic surgical patients in the BAG-RECALL clinical trial. *Anesth Analg* 2014; 118:809–17
14. Wildes TS, Mickle AM, Ben Abdallah A, Maybrier HR, Oberhaus J, Budelier TP, Kronzer A, McKinnon SL, Park D, Torres BA, Graetz TJ, Emmert DA, Palanca BJ, Goswami S, Jordan K, Lin N, Fritz BA, Stevens TW, Jacobsohn E, Schmitt EM, Inouye SK, Stark S, Lenze EJ, Avidan MS; ENGAGES Research Group: Effect of electroencephalography-guided anesthetic administration on postoperative delirium among older adults undergoing major surgery: The ENGAGES randomized clinical trial. *JAMA* 2019; 321:473–83
15. Sieber FE, Zakriya KJ, Gottschalk A, Blute MR, Lee HB, Rosenberg PB, Mears SC: Sedation depth during spinal anesthesia and the development of postoperative delirium in elderly patients undergoing hip fracture repair. *Mayo Clin Proc* 2010; 85:18–26

16. Sieber FE, Neufeld KJ, Gottschalk A, Bigelow GE, Oh ES, Rosenberg PB, Mears SC, Stewart KJ, Ouanes JP, Jaber M, Hasenboehler EA, Li T, Wang NY: Effect of depth of sedation in older patients undergoing hip fracture repair on postoperative delirium: The STRIDE randomized clinical trial. *JAMA Surg* 2018; 153:987–95
17. Deiner S, Westlake B, Dutton RP: Patterns of surgical care and complications in elderly adults. *J Am Geriatr Soc* 2014; 62:829–35
18. Brown CH IV, LaFlam A, Max L, Wyrobek J, Neufeld KJ, Kebaish KM, Cohen DB, Walston JD, Hogue CW, Riley LH: Delirium after spine surgery in older adults: Incidence, risk factors, and outcomes. *J Am Geriatr Soc* 2016; 64:2101–8
19. Kawaguchi Y, Kanamori M, Ishihara H, Abe Y, Nobukiyo M, Sigeta T, Hori T, Kimura T: Postoperative delirium in spine surgery. *Spine J* 2006; 6:164–9
20. Morino T, Hino M, Yamaoka S, Misaki H, Ogata T, Imai H, Miura H: Risk factors for delirium after spine surgery: An age-matched analysis. *Asian Spine J* 2018; 12:703–9
21. Brown CH IV, Jones EL, Lin C, Esmaili M, Gorashi Y, Skelton RA, Kaganov D, Colantuoni EA, Yanek LR, Neufeld KJ, Kamath V, Sieber FE, Dean CL, Edwards CC II, Hogue CW: Shaping anesthetic techniques to reduce post-operative delirium (SHARP) study: A protocol for a prospective pragmatic randomized controlled trial to evaluate spinal anesthesia with targeted sedation compared with general anesthesia in older adults undergoing lumbar spine fusion surgery. *BMC Anesthesiol* 2019; 19:192
22. Punjasawadwong Y, Phongchiewboon A, Bunchungmongkol N: Bispectral Index for improving anaesthetic delivery and postoperative recovery. *Cochrane Database Syst Rev* 2014; 6:CD003843
23. Inouye SK, van Dyck CH, Alessi CA, Balkin S, Siegel AP, Horwitz RI: Clarifying confusion: The confusion assessment method. A new method for detection of delirium. *Ann Intern Med* 1990; 113:941–8
24. Folstein MF, Folstein SE, McHugh PR: “Mini-Mental State.” A practical method for grading the cognitive state of patients for the clinician. *J Psychiatr Res* 1975; 12:189–98
25. Inouye SK, Leo-Summers L, Zhang Y, Bogardus ST Jr, Leslie DL, Agostini JV: A chart-based method for identification of delirium: Validation compared with interviewer ratings using the confusion assessment method. *J Am Geriatr Soc* 2005; 53:312–8
26. Trzepacz PT, Mittal D, Torres R, Canary K, Norton J, Jimerson N: Validation of the Delirium Rating Scale-revised-98: Comparison with the delirium rating scale and the cognitive test for delirium. *J Neuropsychiatry Clin Neurosci* 2001; 13:229–42
27. Pfeiffer E: Multidimensional Functional Assessment: The OARS Methodology. A Manual, 2nd edition. Durham, North Carolina, Duke University Center for the Study of Aging and Human Development, 1978
28. Colantuoni E, Rosenblum M: Leveraging prognostic baseline variables to gain precision in randomized trials. *Stat Med* 2015; 34:2602–17
29. O’Byrne SE, Humphreys JD, Smith GE, Ivnik RJ, Graff-Radford NR, Petersen RC, Lucas JA: Detecting dementia with the Mini-Mental State Examination in highly educated individuals. *Arch Neurol* 2008; 65:963–7
30. Whitmore RG, Stephen JH, Vernick C, Campbell PG, Yadla S, Ghobrial GM, Maltenfort MG, Ratliff JK: ASA grade and Charlson Comorbidity Index of spinal surgery patients: Correlation with complications and societal costs. *Spine J* 2014; 14:31–8
31. Devlin JW, Skrobik Y, Gélinas C, Needham DM, Slooter AJC, Pandharipande PP, Watson PL, Weinhouse GL, Nunnally ME, Rochwerf B, Balas MC, van den Boogaard M, Bosma KJ, Brummel NE, Chanques G, Denehy L, Drouot X, Fraser GL, Harris JE, Joffe AM, Kho ME, Kress JP, Lanphere JA, McKinley S, Neufeld KJ, Pisani MA, Payen JE, Pun BT, Puntillo KA, Riker RR, Robinson BRH, Shehabi Y, Szumita PM, Winkelman C, Centofanti JE, Price C, Nikayin S, Misak CJ, Flood PD, Kiedrowski K, Alhazzani W: Clinical practice guidelines for the prevention and management of pain, agitation/sedation, delirium, immobility, and sleep disruption in adult patients in the ICU. *Crit Care Med* 2018; 46:e825–73
32. Xie Z, Dong Y, Maeda U, Moir R, Inouye SK, Culley DJ, Crosby G, Tanzi RE: Isoflurane-induced apoptosis: A potential pathogenic link between delirium and dementia. *J Gerontol A Biol Sci Med Sci* 2006; 61:1300–6
33. Xu Z, Dong Y, Wu X, Zhang J, McAuliffe S, Pan C, Zhang Y, Ichinose F, Yue Y, Xie Z: The potential dual effects of anesthetic isoflurane on Aβ-induced apoptosis. *Curr Alzheimer Res* 2011; 8:741–52
34. Liu W, Xu J, Wang H, Xu C, Ji C, Wang Y, Feng C, Zhang X, Xu Z, Wu A, Xie Z, Yue Y: Isoflurane-induced spatial memory impairment by a mechanism independent of amyloid-beta levels and tau protein phosphorylation changes in aged rats. *Neurol Res* 2012; 34:3–10
35. Xie Z, Dong Y, Maeda U, Alfille P, Culley DJ, Crosby G, Tanzi RE: The common inhalation anesthetic isoflurane induces apoptosis and increases amyloid beta protein levels. *ANESTHESIOLOGY* 2006; 104:988–94
36. Koning MV, van der Sijp M, Stolker RJ, Niggebrugge A: Intrathecal morphine is associated with less delirium following hip fracture surgery: A register study. *Anesth Pain Med* 2020; 10:e106076
37. Vaurio LE, Sands LP, Wang Y, Mullen EA, Leung JM: Postoperative delirium: The importance of pain and pain management. *Anesth Analg* 2006; 102:1267–73
38. Myles PS, Leslie K, McNeil J, Forbes A, Chan MT: Bispectral Index monitoring to prevent awareness



- during anaesthesia: The B-Aware randomised controlled trial. *Lancet* 2004; 363:1757–63
39. Whitlock EL, Avidan MS: Three blind mice: A tail of discordant trials. *Br J Anaesth* 2020; 124:121–5
40. Devenney E, Hodges JR: The Mini-Mental State Examination: Pitfalls and limitations. *Pract Neurol* 2017; 17:79–80

## ANESTHESIOLOGY REFLECTIONS FROM THE WOOD LIBRARY-MUSEUM

### Dr. Alan Van Poznak Slides the Musical into the Medical Syringe!

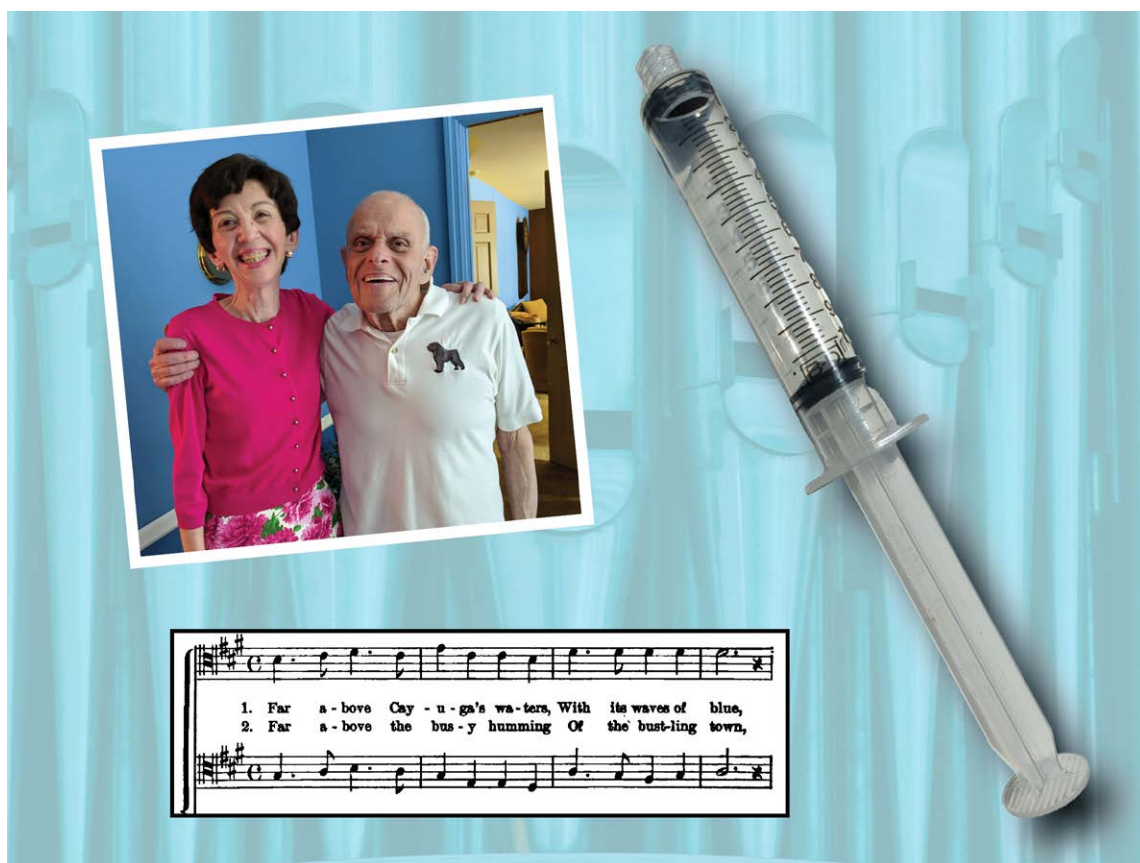

Gentleman, scholar, and lifelong Cornellian, Alan Van Poznak, M.D. (hugging Dr. Kathryn McGoldrick, *upper left*), famously developed methoxyflurane in the 1960s with longtime colleague Joseph Artusio, M.D. Proving his inventive mind was not limited to the lab bench, he combined pieces from two precisely cut syringes and created a musical masterpiece—the syringe slide whistle (*right*)! Once again, fortune favored the prepared mind. Apprenticed to a pipe-organ builder in his teens, Dr. Van Poznak was able to recognize the instrumental potential in the cylindrical syringe. While serenading pediatric patients at the New York Hospital, he taught anesthesia residents both Bernoulli and Venturi principles just before closing lectures with Cornell's school song (*bottom*). To learn how this little whistle sang its way into the hearts of the Big Apple Circus and Late Night TV hosts, watch the full interview of Dr. Van Poznak by former student Kathryn McGoldrick, M.D. (hugging Dr. Van Poznak, *upper left*), in the Wood Library-Museum's John W. Pender Collection of the Living History of Anesthesia (<https://www.woodlibrarymuseum.org/library/living-history>). (Copyright © the American Society of Anesthesiologists' Wood Library-Museum of Anesthesiology.)

Melissa L. Coleman, M.D., Penn State College of Medicine, Hershey, Pennsylvania, and Jane S. Moon, M.D., University of California, Los Angeles, California.
